# Supplementary material for: Subjective right ventricle assessment by echo qualified intensive care specialists: assessing agreement with objective measures
Source: PubMed Central journal article supplement (PMC6407213; doi:10.1186/s13054-019-2375-z), 2019-03-07

## Appendix 1

|                                                                                |          |
|--------------------------------------------------------------------------------|----------|
| How many years have you been using echo? (Give single value, not range)        |          |
| How many TTE do you perform a year? (Give single value, not range)             |          |
| Do you perform echo at level of a cardiologist?                                | Yes / No |
| How many years have you been an ICU specialist? (Give single value, not range) |          |
| What formal echo qualifications do you have?                                   |          |

Please indicate *single* category for **RV size** and **function** for each case based on 'eyeballing' videos

| Case | RV size |                   |        | RV function |                   |        |
|------|---------|-------------------|--------|-------------|-------------------|--------|
|      | Normal  | Mild/<br>moderate | Severe | Normal      | Mild/<br>moderate | Severe |
| 1    |         |                   |        |             |                   |        |
| 2    |         |                   |        |             |                   |        |
| 3    |         |                   |        |             |                   |        |
| 4    |         |                   |        |             |                   |        |
| 5    |         |                   |        |             |                   |        |
| 6    |         |                   |        |             |                   |        |
| 7    |         |                   |        |             |                   |        |
| 8    |         |                   |        |             |                   |        |
| 9    |         |                   |        |             |                   |        |
| 10   |         |                   |        |             |                   |        |
| 11   |         |                   |        |             |                   |        |
| 12   |         |                   |        |             |                   |        |
| 13   |         |                   |        |             |                   |        |
| 14   |         |                   |        |             |                   |        |
| 15   |         |                   |        |             |                   |        |
| 16   |         |                   |        |             |                   |        |
| 17   |         |                   |        |             |                   |        |
| 18   |         |                   |        |             |                   |        |
| 19   |         |                   |        |             |                   |        |
| 20   |         |                   |        |             |                   |        |
| 21   |         |                   |        |             |                   |        |
| 22   |         |                   |        |             |                   |        |
| 23   |         |                   |        |             |                   |        |
| 24   |         |                   |        |             |                   |        |
| 25   |         |                   |        |             |                   |        |
| 26   |         |                   |        |             |                   |        |
| 27   |         |                   |        |             |                   |        |
| 28   |         |                   |        |             |                   |        |
| 29   |         |                   |        |             |                   |        |
| 30   |         |                   |        |             |                   |        |
| 31   |         |                   |        |             |                   |        |
| 32   |         |                   |        |             |                   |        |
| 33   |         |                   |        |             |                   |        |
| 34   |         |                   |        |             |                   |        |
| 35   |         |                   |        |             |                   |        |
| 36   |         |                   |        |             |                   |        |

| Case | RV size |                   |        | RV function |                   |        |
|------|---------|-------------------|--------|-------------|-------------------|--------|
|      | Normal  | Mild/<br>moderate | Severe | Normal      | Mild/<br>moderate | Severe |
| 37   |         |                   |        |             |                   |        |
| 38   |         |                   |        |             |                   |        |
| 39   |         |                   |        |             |                   |        |
| 40   |         |                   |        |             |                   |        |
| 41   |         |                   |        |             |                   |        |
| 42   |         |                   |        |             |                   |        |
| 43   |         |                   |        |             |                   |        |
| 44   |         |                   |        |             |                   |        |
| 45   |         |                   |        |             |                   |        |
| 46   |         |                   |        |             |                   |        |
| 47   |         |                   |        |             |                   |        |
| 48   |         |                   |        |             |                   |        |
| 49   |         |                   |        |             |                   |        |
| 50   |         |                   |        |             |                   |        |
| 51   |         |                   |        |             |                   |        |
| 52   |         |                   |        |             |                   |        |
| 53   |         |                   |        |             |                   |        |
| 54   |         |                   |        |             |                   |        |
| 55   |         |                   |        |             |                   |        |
| 56   |         |                   |        |             |                   |        |
| 57   |         |                   |        |             |                   |        |
| 58   |         |                   |        |             |                   |        |
| 59   |         |                   |        |             |                   |        |
| 60   |         |                   |        |             |                   |        |
| 61   |         |                   |        |             |                   |        |
| 62   |         |                   |        |             |                   |        |
| 63   |         |                   |        |             |                   |        |
| 64   |         |                   |        |             |                   |        |
| 65   |         |                   |        |             |                   |        |
| 66   |         |                   |        |             |                   |        |
| 67   |         |                   |        |             |                   |        |
| 68   |         |                   |        |             |                   |        |
| 69   |         |                   |        |             |                   |        |
| 70   |         |                   |        |             |                   |        |
| 71   |         |                   |        |             |                   |        |
| 72   |         |                   |        |             |                   |        |
| 73   |         |                   |        |             |                   |        |
| 74   |         |                   |        |             |                   |        |
| 75   |         |                   |        |             |                   |        |
| 76   |         |                   |        |             |                   |        |
| 77   |         |                   |        |             |                   |        |
| 78   |         |                   |        |             |                   |        |
| 79   |         |                   |        |             |                   |        |
| 80   |         |                   |        |             |                   |        |

**Appendix 3**

|                                |                   | Reference standard<br>(RV free wall strain) |                    |        | <i>Total</i> |
|--------------------------------|-------------------|---------------------------------------------|--------------------|--------|--------------|
|                                |                   | Normal                                      | Mild /<br>moderate | Severe |              |
| Subjective<br>RV<br>assessment | Normal            | 12                                          | 4                  | 0      | 16           |
|                                | Mild-<br>moderate | 8                                           | 12                 | 2      | 22           |
|                                | Severe            | 0                                           | 4                  | 8      | 12           |
| <i>Total</i>                   |                   | 20                                          | 20                 | 10     | 50           |

# Appendix 4

## RV size assessment

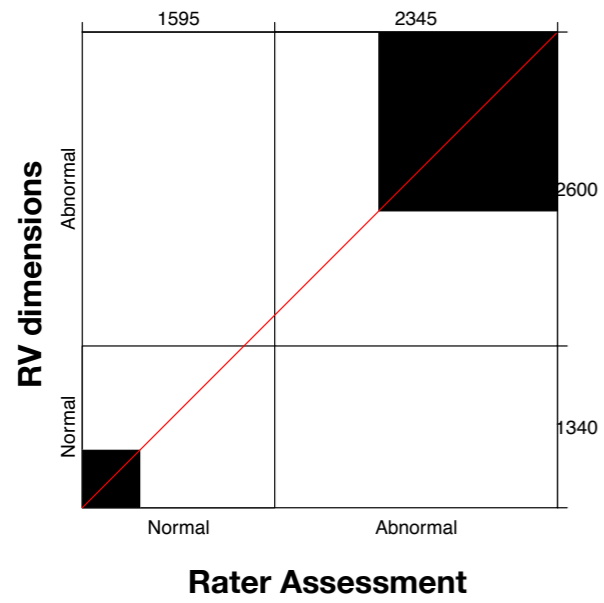

## RV function assessment

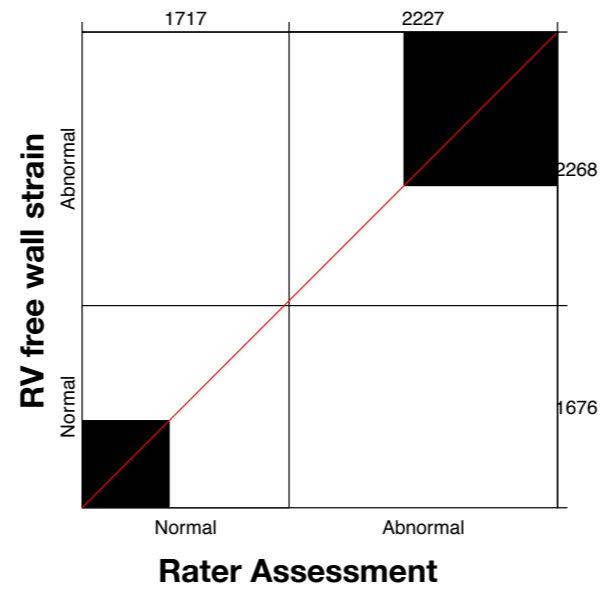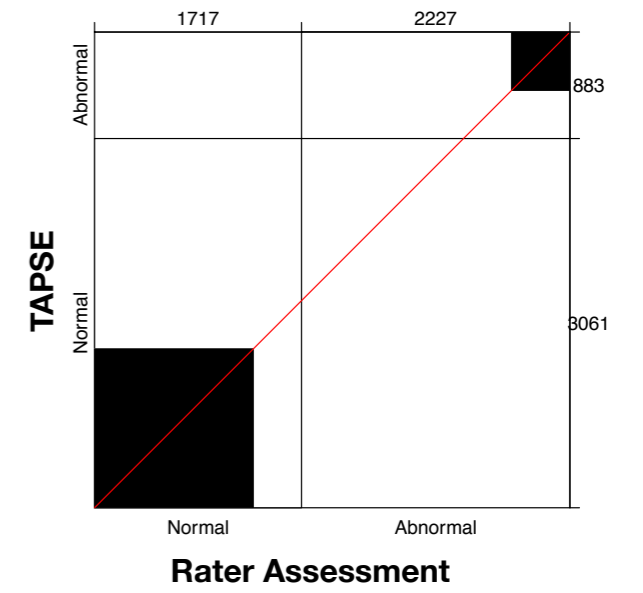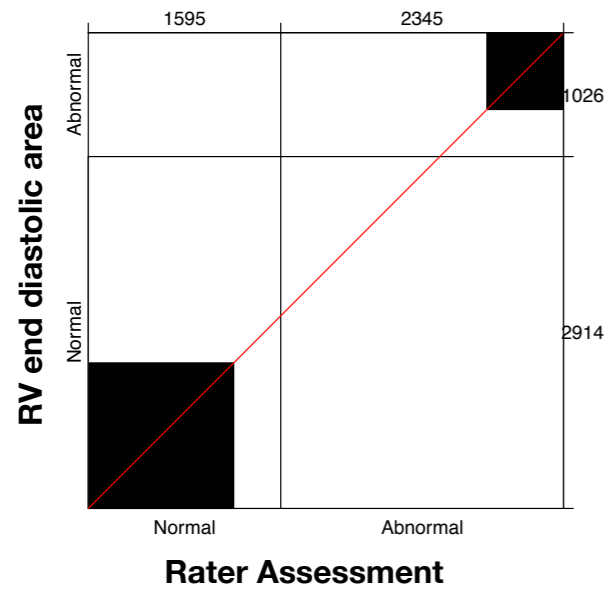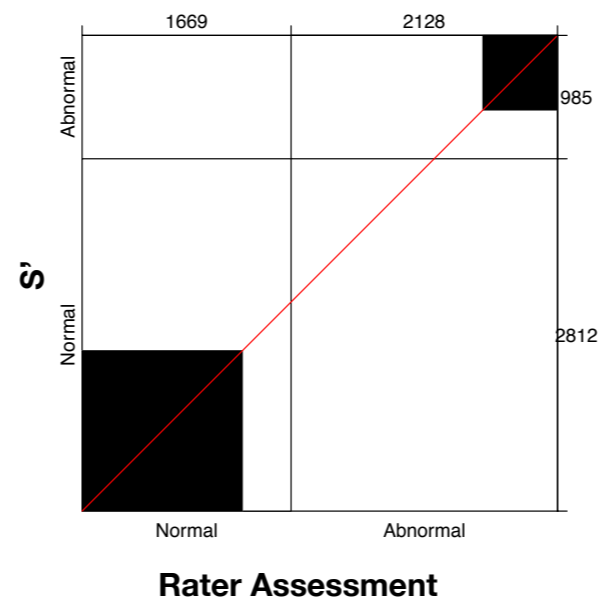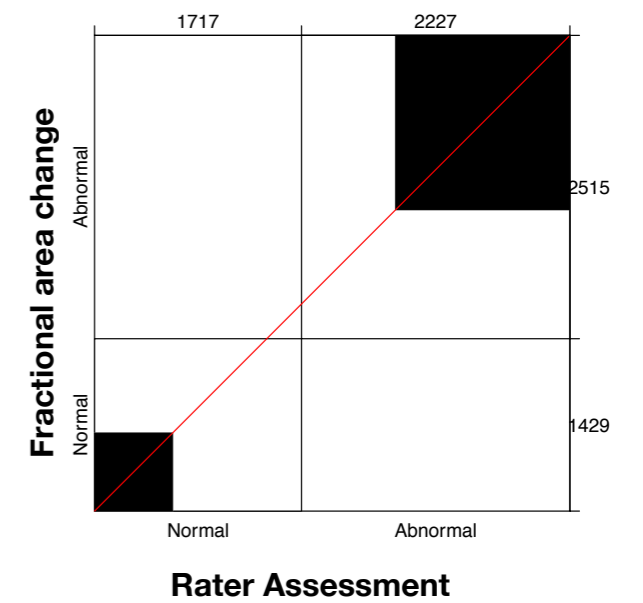

# Appendix 5

Less than 7 years experience

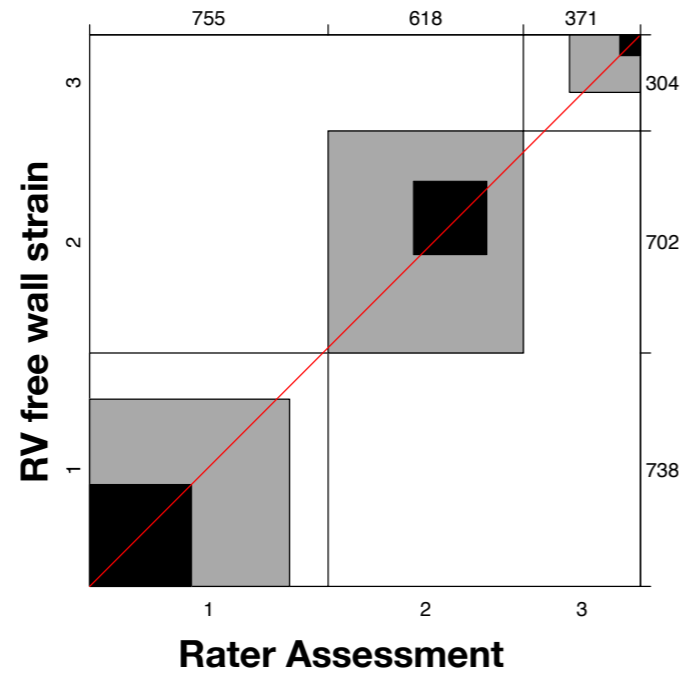

More than 7 years experience

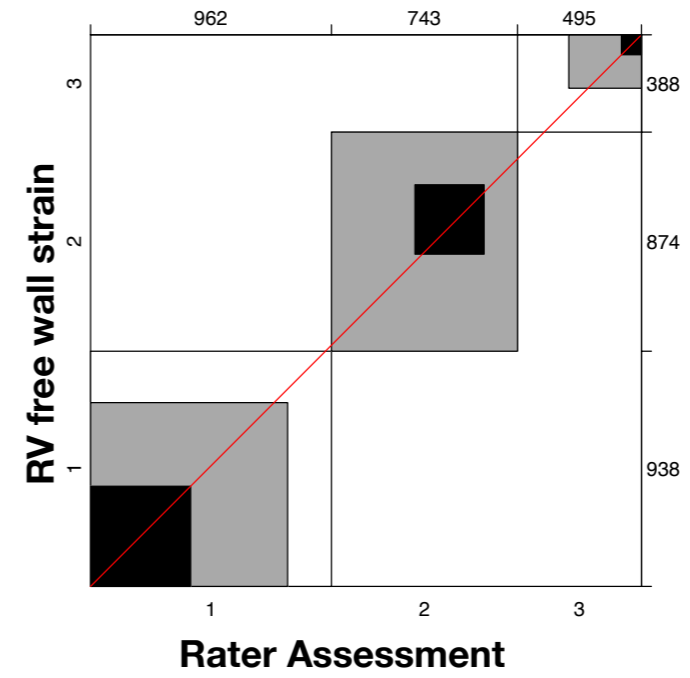

Less than 7 years experience

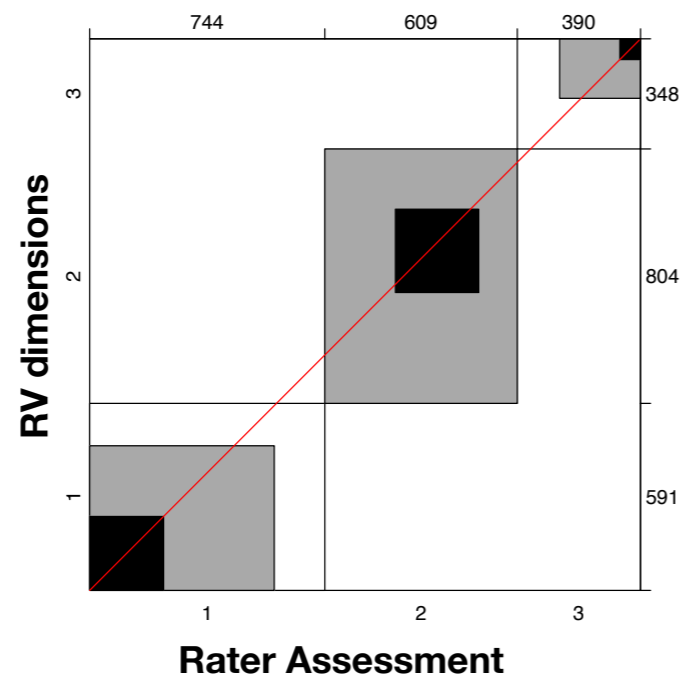

More than 7 years experience

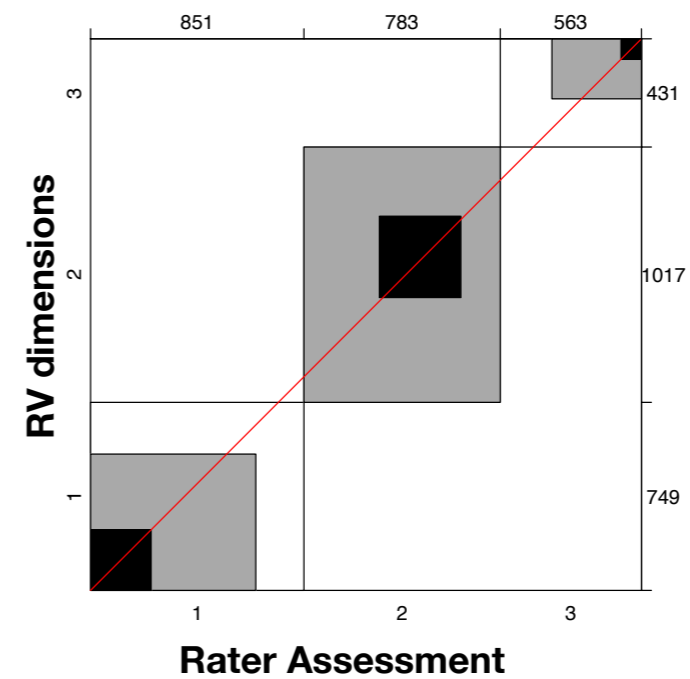

# Appendix 6

Non-cardiologist

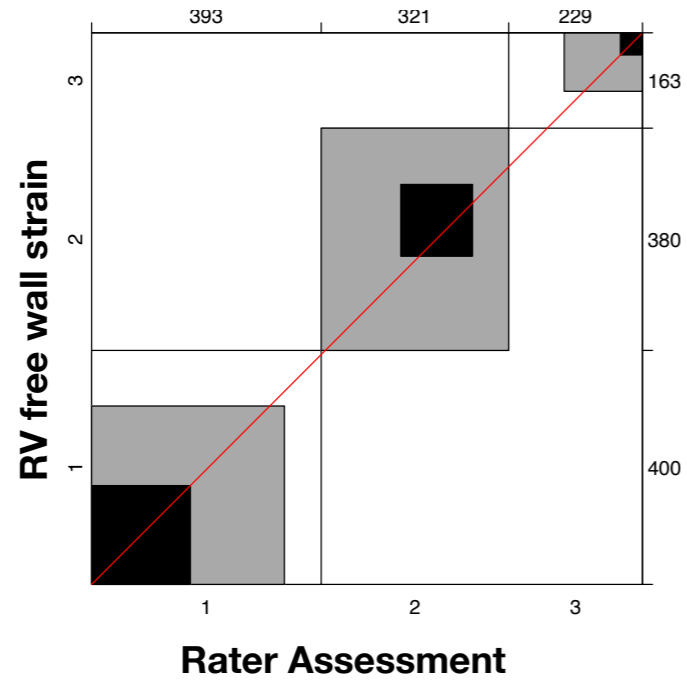

Cardiologist

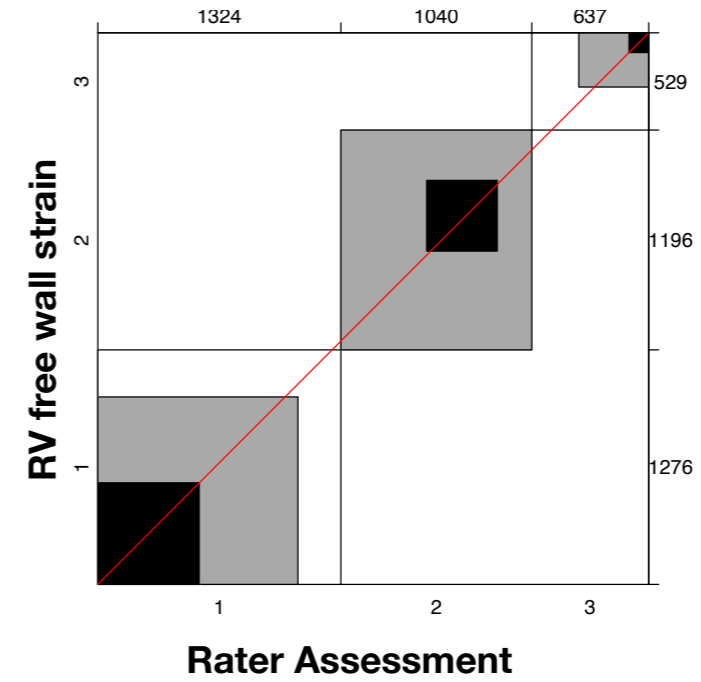

Non-cardiologist

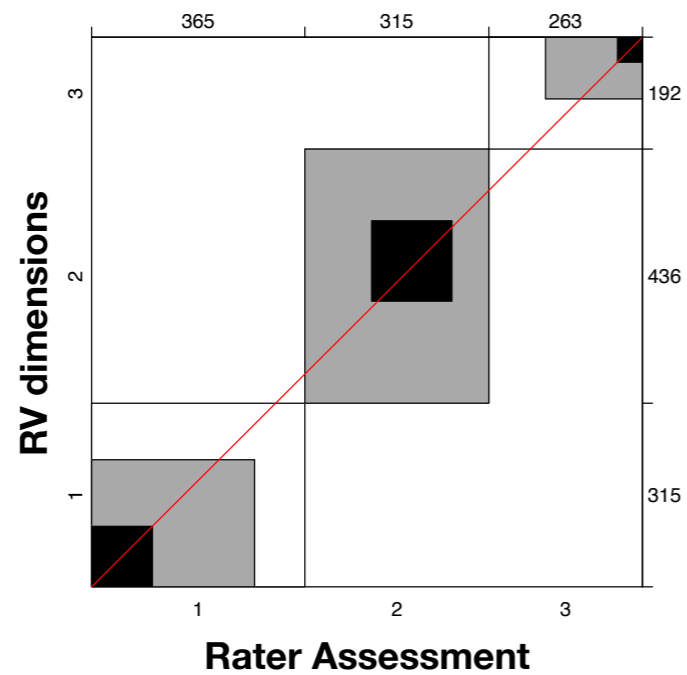

Cardiologist

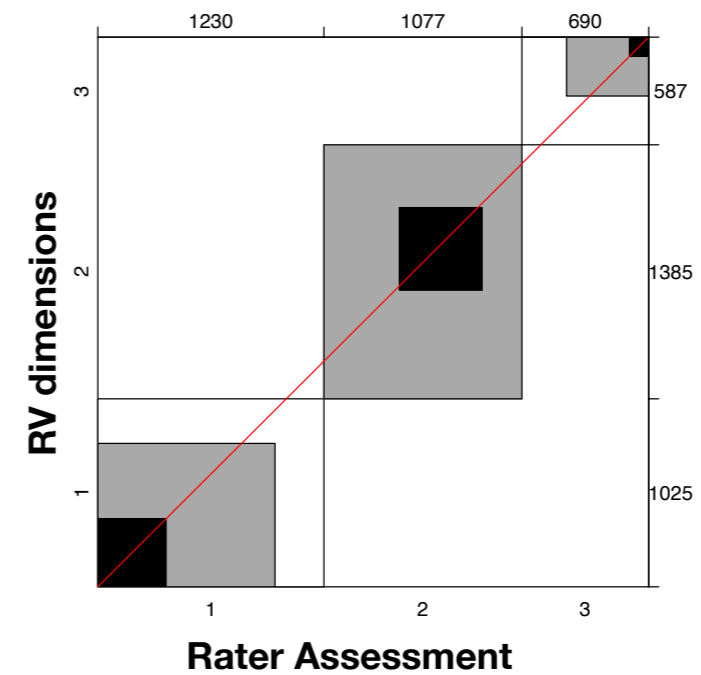

# Appendix 7

Non-DDU qualification

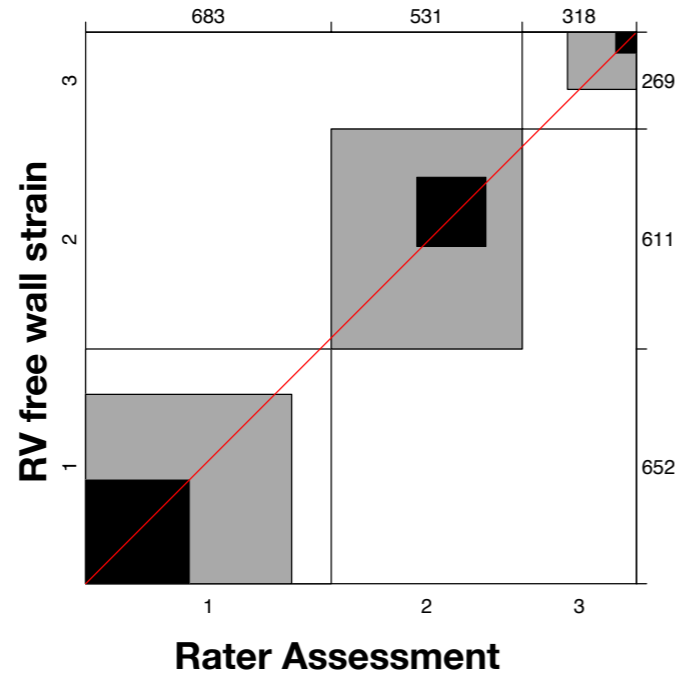

DDU qualification

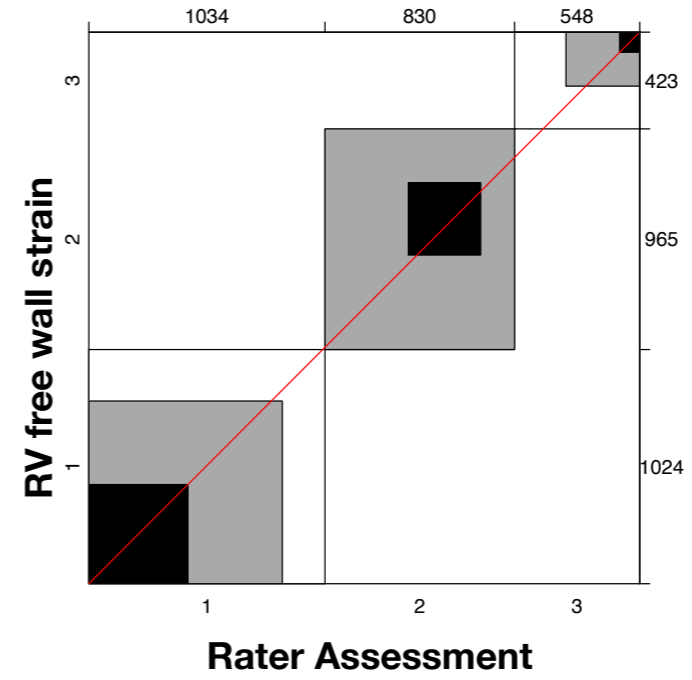

Non-DDU qualification

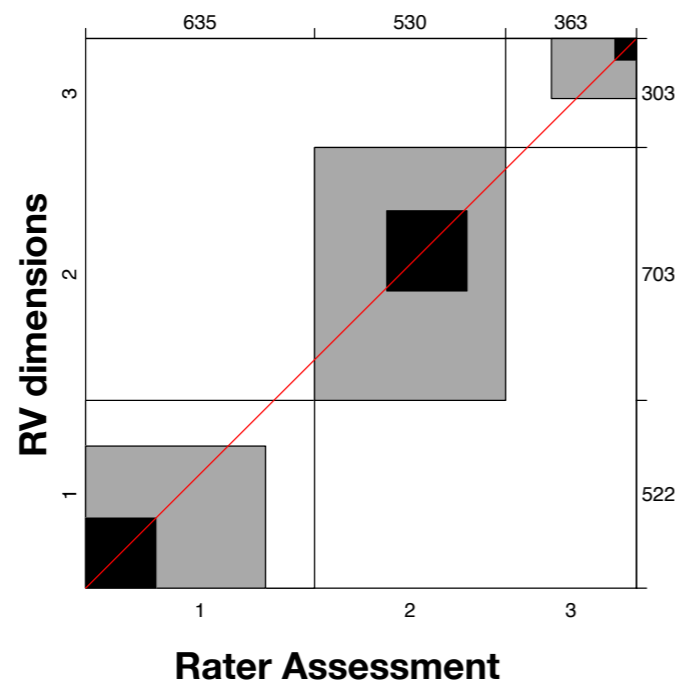

DDU qualification

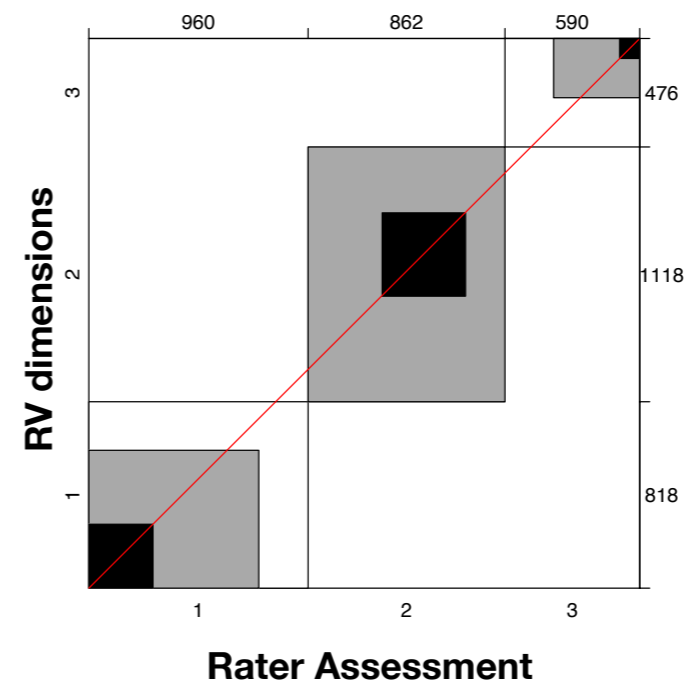

Supplement: 13054_2019_2375_MOESM1_ESM.pdf [file 13054_2019_2375_MOESM1_ESM.pdf]
